1 **Extracellular vesicle-mediated RNA release in *Histoplasma***  
2 ***capsulatum***

3 Running title: ***Histoplasma capsulatum* extracellular vesicles RNA**

4 Lysangela R. Alves<sup>\*1</sup>, Roberta Peres da Silva<sup>2</sup>, David A. Sanchez<sup>3</sup>, Daniel Zamith-  
5 Miranda<sup>3</sup>, Marcio L. Rodrigues<sup>1,4</sup>, Samuel Goldenberg<sup>1</sup>, Rosana Puccia<sup>2</sup> and Joshua D.  
6 Nosanchuk<sup>\*3</sup>

7 Affiliations

- 8 1. Instituto Carlos Chagas, Fiocruz, Cidade Industrial de Curitiba, Curitiba, Brazil;  
9 2. Departamento de Microbiologia, Imunologia e Parasitologia da Escola Paulista de  
10 Medicina, Universidade Federal de São Paulo - UNIFESP, São Paulo, Brazil;  
11 3. Departments of Medicine (Division of Infectious Diseases) and Microbiology and  
12 Immunology, Albert Einstein College of Medicine, Bronx, New York, USA;  
13 4. Instituto de Microbiologia da Universidade Federal do Rio de Janeiro, Brazil.

14 Correspondence:

15 \* lys.alves@gmail.com; Lysangela R. Alves, Instituto Carlos Chagas, Fiocruz, Cidade  
16 Industrial de Curitiba, Curitiba, Brazil

17 \* josh.nosanchuk@einstein.yu.edu; Joshua D. Nosanchuk, Albert Einstein College of  
18 Medicine, 1300 Morris Park Avenue, Bronx, NY 10461, USA

## 19 **Abstract**

20 Eukaryotic cells, including fungi, release extracellular vesicles (EVs). These lipid  
21 bilayered compartments play essential roles in cellular communication and pathogenesis.  
22 EV composition is complex and includes proteins, glycans, pigments, and RNA. RNA  
23 classes with putative roles in pathogenesis have been described in EVs produced by  
24 fungi. Here we describe the RNA content in EVs produced by the G186AR and G217B  
25 strains of *Histoplasma capsulatum*, an important human fungal pathogen. A total of 124  
26 mRNA were identified in both strains. In this set of RNA classes, 93 transcripts were  
27 enriched in EVs from the G217B strain, while 31 enriched in EVs produced by the G186AR  
28 strain. This result suggests that there are important strain-specific properties in the mRNA  
29 composition of fungal EVs. We also identified short fragments (25-40 long) that were  
30 strain-specific, with a greater number of them identified in EVs produced by the G217B  
31 strain. Remarkably, the most enriched processes were stress responses and translation.  
32 Half of these fragments aligned to the reverse strand of the transcript, suggesting the  
33 occurrence of miRNA-like molecules in fungal EVs. We also compared the transcriptome  
34 profiles of *H. capsulatum* with the RNA composition of EVs and no correlation was  
35 observed. Altogether, our study provided information about the RNA molecules present in  
36 *H. capsulatum* EVs, and the differences in composition between the G186AR and G217B  
37 strains. In addition, we showed that the correlation between the most expressed  
38 transcripts in the cell and their presence in the EVs, reinforcing the idea that the RNAs  
39 were directed to the EVs by a regulated mechanism.

## 40 **Importance**

41 Extracellular vesicles (EVs) play important roles in cellular communication and  
42 pathogenesis. The RNA molecules in EVs have been implicated in a variety of processes.  
43 In pathogenic fungi, EV-associated RNA classes have recently been described; however,  
44 only a few studies describing the RNA in fungal EVs are available. An improved  
45 knowledge on EV-associated RNA will contribute to the understanding of their role during  
46 infection. In this study, we described the RNA content in EVs produced by two isolates of  
47 *Histoplasma capsulatum*. Our results add this important pathogen to the current short list  
48 of fungal species with the ability to use EVs for the extracellular release of RNA.

## 49 Introduction

50 *Histoplasma capsulatum* is major human fungal pathogen on the global stage that  
51 causes disease in both immunocompetent and immunocompromised individuals, albeit the  
52 risk for severe disease increases with compromised immunity (e.g. in patients with HIV or  
53 cancer as well as individuals receiving steroids or TNF-alpha blockers). In the United  
54 States of America, it is the most common cause of fungal pneumonia (1). *H. capsulatum* is  
55 a particular concern in certain developing regions (2), especially in Latin American  
56 countries including Brazil (3, 4), Guatemala (5), and French Guiana, where it is considered  
57 the “first cause of AIDS-related death” (6). Despite its clear importance, enormous gaps  
58 exist in our understanding of the pathogenesis of histoplasmosis, the disease caused by  
59 *H. capsulatum*. An interesting facet of *H. capsulatum*'s biology is its ability to release  
60 extracellular vesicles (EVs) (7, 8).

61 EVs are bilayered lipid structures released by remarkably diverse cells across all  
62 kingdoms (9). We have demonstrated that EVs are present in both ascomycetes and  
63 basidiomycetes (7, 10–14). This observation implies that mechanisms for EV production  
64 and release are truly ancient, as they appear to predate the divergence of these branches  
65 0.5–1.0 billion years ago. Fungal EVs can carry biologically active proteins, carbohydrates,  
66 lipids, pigments and nucleic acids (15, 16), many of which are constituents of the fungal  
67 cell wall and diverse others are associated with stress response and pathogenesis.

68 EV-mediated transport of fungal RNA was recently shown in both commensal and  
69 opportunistic fungi. EV RNA molecules, mostly smaller than 250 nt, were identified in  
70 *Cryptococcus neoformans*, *Paracoccidioides brasiliensis*, *Candida albicans*,  
71 *Saccharomyces cerevisiae*, and *Malassezia sympodialis* (17, 18). Since *H. capsulatum*  
72 packages diverse compounds within EVs, we postulated that it too would use these  
73 compartments to export RNA. In this study, the EV-associated RNA components were  
74 characterized in two different isolates of *H. capsulatum*. As described in other fungi, *H.*  
75 *capsulatum* EVs carry both mRNAs and non-coding (nc)RNAs. In addition, proteomic data  
76 allowed the identification of 139 RNA-binding proteins in the EVs, suggesting that proteins  
77 involved in RNA metabolism might play an important role in cell communication through  
78 the EVs. Our results add this important pathogen to the list of fungal species with the  
79 ability to use EVs for the extracellular release of RNA.

## 80 **Results**

### 81 ***Histoplasma capsulatum* EVs contain RNA**

82 We characterized the RNA molecules contained in EVs isolated from culture  
83 supernatant samples of the *H. capsulatum* strains G186AR and G217B. These strains  
84 belong to distinct clades, and G217B is more virulent than G186AR in experimental  
85 models (19, 20). The most well-known difference between these two strains is that G217B  
86 lacks alpha-1,3-glucan on the yeast form cell wall (19, 20).

87 The reads obtained from the mRNA libraries (reads >200 nt) were aligned with each  
88 strain-specific genome available at the NCBI (G186AR ABBS02 and G217B ABBT01. For  
89 data validation, we only considered sequences with expression values of Transcripts Per  
90 Million (TPM)  $\geq 100$  in all biological replicates and transcripts with reads covering at least  
91 50% of the CDS. The sRNA fraction was analyzed for the presence of different species of  
92 non-coding (nc)RNA by aligning the small RNA fraction (reads <200 nt) with the *H.*  
93 *capsulatum* G186AR strain. These RNA molecules were compared between the strains in  
94 order to gain insights into the role of the EV-RNA in this fungus and also to determine if  
95 there were differences in their composition between the two strains with distinct  
96 phenotypes.

### 97 **Strain-specific content of EV RNA in *H. capsulatum***

98 We identified a total of 124 mRNA sequences in EV samples from the two strains  
99 and carried out paired comparison between the G186AR and G217B samples. We applied  
100 the statistical negative binomial test with filters corresponding to  $\text{TPM} \geq 100$ ,  $\log_2 \geq 2$  and  
101  $\text{FDR} \leq 0.05$ . We observed 93 transcripts enriched in EVs derived from the G217B strain,  
102 while 31 transcripts were enriched in the G186AR strain (Supplemental Table 1). From the  
103 G217B-associated transcripts, we observed enrichment in biological processes for vesicle-  
104 mediated transport (18%), oxidation-reduction mechanisms (12%), transmembrane  
105 transport (11%) and translation (8%) (Figure 1). For the G186AR strain, the mRNA  
106 sequences were only enriched in general cellular and metabolic processes (59%). These  
107 results suggest that there are important differences in the mRNA composition of EVs  
108 derived from these two strains of *H. capsulatum*.

### 109 ***H. capsulatum* EVs contain mRNA fragments and miRNA-like molecules**

110 In addition to the identification of full-length transcripts in EVs, we also detected  
111 short reads of 25-40 nt in average that aligned consistently in the CDS, but at specific

112 positions of the mRNAs (3', 5' or middle); about 50% of these short fragments aligned to  
113 the reverse strand. A total of 172 (G217B), and 80 (G186AR) sequences of this type  
114 (Table 1). A total of 172 fragments were represented in the G217B sample compared to  
115 only 80 found in the G186AR EVs (Table 1). About 47% of the reference mRNA translate  
116 proteins of unknown biological processes. Those associated with DNA  
117 metabolism/biogenesis were the second most abundant for both EV samples (22 for  
118 G217B versus 16 for G186AR), followed by transport for G217B, and protein modification  
119 for both strain EVs. Other processes related to short RNAs identified in both strain EVs  
120 were oxidation-reduction, signaling, and carbohydrate and lipid metabolism (Table 1). RNA  
121 fragments associated with translation were highly enriched in G217B (11) but not in  
122 G186AR (2) EVs, while those related to response to stress were found exclusively in the  
123 G217B sample. The corresponding proteins are stress response protein *whi2*, the DNA  
124 repair protein *rad5* and a thermotolerance protein (Table 1). Analysis of translation-related  
125 sequences allowed identification of mRNA fragments associated to distinct steps of the  
126 translation process, such as ribosome biogenesis and processing. Other metabolic  
127 pathways identified in both strains were protein modification, carbohydrate, and lipid  
128 metabolism, signaling, oxidation-reduction and transmembrane-transport, among others  
129 (Table 1).

130 To gain further insight into the role of these mRNA-fragments, to determine if they  
131 could be derived from a miRNA-like pathway and to assess if they could play a biological  
132 role in the recipient cell, we searched for RNA secondary structures, since they are  
133 fundamental for gene expression regulation (21). A wide study of RNA structures in distinct  
134 cells revealed regulatory effects of the RNA structure throughout mRNA life cycle such as  
135 polyadenylation, splicing, translation, and turnover (22, 23). A total of 54 RNAs with  
136 putative structures were generated by a probability distribution, using a free energy ( $\Delta G$ )  
137 less than or equal to  $-7.0$  (Supplemental table 2). On the basis of this parameter, we  
138 identified transcripts for U3 small nucleolar RNA-associated protein, L-isoaspartate O-  
139 methyltransferase, serine/threonine-protein kinase, proteasome component C5, pre-rRNA  
140 processing protein Utp22, C-x8-C-x5-C-x3-H zinc finger protein, fungal specific  
141 transcription factor domain-containing protein and DNA damage-responsive transcriptional  
142 repressor RPH1 were identified (Figure 2 and Supplemental table 2).

### 143 **Comparison of EV ncRNA classes in *H. capsulatum* EVs**

144 We used the ncRNA database from *H. capsulatum* to identify the classes of ncRNA  
145 present in EVs RNA. The data analysis revealed 73 different sequences of ncRNA in *H.*

146 *capsulatum* EVs from the G186AR strain and 38 from the G217B isolate. Thirty three  
147 molecular species were common to both strains and 40 were exclusively identified in the  
148 G186AR strain and the most abundant class of ncRNA found in *H. capsulatum* EVs was  
149 tRNAs (Table 2).

### 150 **Analysis of proteins putatively associated to RNA metabolism in the EVs**

151 As a rule, cellular RNAs are covered with proteins and exist as ribonucleoprotein  
152 complexes. The proteins associated to RNAs are named RNA-binding proteins (RBPs).  
153 These proteins participate on several biological processes, from transcription to RNA  
154 decay (24). In this context, we investigated the presence of RBPs in the *H. capsulatum*  
155 EVs. We analyzed the proteomic EV data available for the G217B strain (25) and we  
156 identified 139 proteins related to RNA metabolism (8) (Table 3 and Supplemental table 3).  
157 We found many RBPs, such as PolyA binding protein (PABP), Nrd1, Prp24, and Snd1;  
158 splicing factors, exosome complex components and ribosomal proteins (Table 3 and  
159 Supplemental table 3) were identified. In addition, we also found the quelling deficient  
160 protein 2 (QDE2), an argonaute protein important in the RNA machinery in fungi. As we  
161 identified the QDE2 in EVs, we searched for the components of the RNAi machinery in *H.*  
162 *capsulatum*, and compared them with the proteins from *Neurospora crassa* and  
163 *Schizosaccharomyces pombe*, which are fungal species where the RNAi machinery has  
164 been most well described (26, 27). *H. capsulatum* EVs contained one argonaute protein  
165 (QDE2), two dicer-like proteins, the QIP (quelling interaction protein) and the RNA-  
166 dependent RNA polymerase (QDE1) (Table 4).

### 167 **Comparison of cellular RNA vs. EV RNA shows a distinct enrichment of molecules** 168 **in the vesicles**

169 We next assessed the composition of cellular RNA from *H. capsulatum* yeast cells  
170 (28) and compared this information to that obtained from EV-associated RNA composition  
171 under the same conditions. There was no correlation between the transcripts with highest  
172 expression levels and their presence in the EVs (Supplemental table 4). Examples of  
173 highly expressed cellular transcripts included histones 4, 2B, and 2A, allergen Asp f4,  
174 chaperones, and translation factors, among others (Supplemental table 4). In contrast,  
175 zinc knuckle domain-containing protein, vacuolar ATP synthase subunit C, G1/S regulator,  
176 thermotolerance protein, histone variant H2A.Z and proteasome component C5 had an  
177 enrichment value greater than 7,000 in the EVs, while they showed low expression values  
178 in the cell (Supplemental table 4). The differences in composition between cells and EVs

179 were also evaluated by grouping the transcripts into biological processes (Figure 3). For  
180 the yeast cells, the main pathways were associated with transport, translation and general  
181 metabolic processes (Figure 3). For the EVs, the enriched pathways were transmembrane  
182 transport, protein phosphorylation and transcription regulation (Figure 3). This result  
183 demonstrates the low levels of correlation between the most expressed cellular mRNAs  
184 and EV cargo, evidencing there might be a mechanism directing the RNA molecules to the  
185 EVs.

## 186 Discussion

187 As previously described (17, 18), RNA molecules associated to fungal EVs are  
188 remarkably diverse. For instance, mRNAs, tRNA fragments, snoRNAs, snRNAs, and  
189 miRNA-like molecules were characterized in EVs from *C. albicans*, *C. neoformans*, *P.*  
190 *brasiliensis* and *S. cerevisiae* (17). In *H. capsulatum* EVs we observed a similar  
191 distribution of RNA molecules. The comparison between G186AR and G217B EVs  
192 revealed important differences in the variety of mRNAs identified. When the mRNA  
193 composition was compared to what was described for other fungi, important similarities  
194 were observed. For example, the most abundant biological process identified in G217B  
195 EVs was vesicle-mediated transport, which was also the most abundant process in *C.*  
196 *albicans* EVs (17). Molecules required for ribosome biogenesis, which were observed in  
197 G217B EVs, belonged to the most enriched process in *S. cerevisiae* EVs (17). However,  
198 when the ncRNA molecules were compared, different profiles were observed. Most of the  
199 ncRNA in *H. capsulatum* strains derived from tRNAs; a similar profile was obtained with *C.*  
200 *albicans* (17). In addition, in *H. capsulatum*, almost no snoRNAs were identified, but this  
201 class of ncRNAs was one of the most abundant in the EVs of other fungi (17). Differences  
202 in EVs composition have been observed in *C. neoformans*; EV-associated RNA produced  
203 by mutant cells with defective unconventional secretion differed considerably from similar  
204 samples produced by wild-type cells (29).

205 In our study, we identified short reads that aligned specifically to exons; however,  
206 these sequences did not correspond to complete mRNAs in the EVs. They rather  
207 corresponded to 25 nt long fragments that were enriched in specific exons of the  
208 transcript. These fragments of mRNAs were previously described in human cells (30)  
209 where most of the transcripts identified in the EVs corresponded to a fraction of the mRNA  
210 with an enrichment of the 3'-end of the transcript (30). This human study led to the  
211 hypothesis that the mRNA fragments had a role in gene expression regulation in the  
212 recipient cells as the secreted mRNA could act as competitors to regulate stability,

213 localization and translation of mRNAs in target cells (30). In *Mucor circinelloides* cells, the  
214 RNA silencing pathway (sRNA) resulted in the production of both sense and antisense  
215 small RNAs (31–33). Sequencing analysis of the small RNA content of this fungus showed  
216 the existence of exonic small interfering RNAs (ex-siRNA) as a new type of sRNA. They  
217 were produced from exons of the same genes that are later regulated through the  
218 repression of the corresponding mRNA (34). This result agrees with our observation of  
219 short reads in the exonic regions of the transcripts. We therefore hypothesize that; similar  
220 to what was described for *M. circinelloides* cells, and the *H. capsulatum* EV fragments can  
221 regulate expression of their own mRNAs. Of note, we also found a highly represented  
222 population of putative exonic-siRNA in *Paracoccidioides* strains (Peres da Silva et al.,  
223 submitted).

224 As *H. capsulatum* EVs contain different RNA molecules, it is reasonable to  
225 hypothesize that proteins that regulate RNA metabolism are also present in the EVs,  
226 probably associated to RNA. If validated, this hypothesis could indicate how a specific  
227 subset of RNAs are directed to the vesicles and exported. RNA binding proteins (RBPs)  
228 participate in several biological processes, from RNA transcription to decay (24). We  
229 detected a number of RNA binding proteins in *H. capsulatum* EVs (25). In other systems,  
230 these proteins were also identified in association with EVs. For example, in EVs produced  
231 by human epithelial cells, 30 RBPs were identified (35), including heterogeneous nuclear  
232 ribonucleoproteins (hnRNPs). These proteins are responsible for directing pre-mRNAs in  
233 the maturation processes that culminate with transcriptional regulation, alternative splicing,  
234 transport, and localization (35). In addition, RBPs in EVs were identified in distinct models  
235 as hepatocytes, human embryonic kidney (HEK) cells, and mouse myoblast cells (35–37).  
236 Interestingly, one of the RBPs identified in EVs was SND1 (Staphylococcal nuclease  
237 domain-containing protein 1), which is a main component of RISC complex (RNA-induced  
238 silencing complex) that plays an important role in miRNA function (37).

239 Another example of a protein identified in the EVs of *H. capsulatum* and distinct  
240 organisms is an endonuclease of the Ago2 family. An infection model with *Plasmodium*  
241 *falciparum* demonstrated that infected red blood cells released EVs containing functional  
242 miRNA-argonaute 2 complexes (38). Moreover, endothelial cells internalized the *P.*  
243 *falciparum* EVs, and the miRNA-argonaute 2 complex were transferred to the cells and  
244 acted regulating the gene expression and in the barrier properties of the recipient cells  
245 (38). The argonaute protein in *H. capsulatum* named QDE2 was identified enriched in the  
246 EVs of the G217B strain.

247 Small silencing RNAs include a variety of molecules, such as microRNAs (miRNAs)



248 and various small interfering RNAs (siRNAs), such as exo-siRNAs, endo-siRNAs, and pi-  
249 RNAs (39). Previous studies of small RNAs in fungi have identified the RNAi machinery in  
250 the fission yeast *Schizosaccharomyces pombe*, in the budding yeast *S. castellii*, *C.*  
251 *albicans*, and in filamentous fungi (26, 27, 40). One of the best-characterized models is the  
252 filamentous fungus *N. crassa* (27, 41–45). The RNAi machinery in this organism is a  
253 defense against transposons (46). A similar process has been described in *C.*  
254 *neoformans*, where RNAi is involved in the regulation of transposon activity and genome  
255 integrity during vegetative growth (47). In *N. crassa*, the *QDE2* gene encodes an  
256 Argonaute protein that is homologous to the *rde-1* gene in *C. elegans*, a protein required  
257 for dsRNA-induced silencing (27). The characterization of RNAs associated to QDE2 in *N.*  
258 *crassa* led to the identification of miRNA-like RNAs (milRNAs) in this organism (48). The  
259 identification of QDE2 in *H. capsulatum* EVs in association to the small RNAs indicate that  
260 the complex QDE2-milRNA might be directed to the EVs and possibly delivered to  
261 recipient cells, with the potential to interfere with gene expression regulation and / or cell-  
262 cell communication.

263 Fungal EVs have been implicated in a number of communication processes,  
264 including transfer of virulence (49) and antifungal resistance (50). In *C. gattii*, pathogen-to-  
265 pathogen communication via EVs reverted an avirulent phenotype through mechanisms  
266 that required vesicular RNA (49). The sequences required for this process, however,  
267 remained unknown. This is an efficient illustration of the potential derived from the  
268 characterization of EV-associated RNA in fungi. In this context, our study provides  
269 information in the *H. capsulatum* model that will allow the design of pathogenic  
270 experimental models aiming at characterizing the role of extracellular RNAs in fungal  
271 pathogenesis.

## 272 **Material and Methods**

### 273 **Fungal strains and growth conditions**

274 The *H. capsulatum* strains were stored long term at -80°C. Aliquots were inoculated  
275 into Ham's F-12 media (Gibco, Cat# 21700-075) supplemented with glucose (18.2□g/L),  
276 L-cysteine (8.4□mg/L), HEPES (6□g/L) and glutamic acid (1□g/L) and cultivated with  
277 constant shaking at 150□rpm at 37°C. Viability assessments were performed using Janus  
278 green 0.02%, and all aliquots used had >99% of live yeast cells. EVs were then isolated  
279 from fungal culture supernatants as previously described (51).

### 280 **sRNA isolation**

281 Small RNA enriched fractions were isolated with the miRNeasy mini kit (Qiagen)  
282 and were then treated with the RNeasy MinElute Cleanup Kit (Qiagen), according to the  
283 manufacturer's protocol, to obtain small RNA-enriched fractions. The sRNA profile was  
284 assessed in an Agilent 2100 Bioanalyzer (Agilent Technologies).

### 285 **RNA sequencing**

286 One hundred ng of purified sRNA were used for RNA-seq analysis from two  
287 independent biological replicates. The RNA-seq was performed in a SOLiD 3 plus platform  
288 using the RNA-Seq kit (Life Science) according to the manufacturer's recommendations.

### 289 ***In silico* data analysis**

290 The sequencing data were analyzed using the version 10.1 of CLC Genomics  
291 Workbench©. The reads were trimmed on the basis of quality, with a threshold Phred  
292 score of 25. The reference genomes used for mapping were obtained from the NCBI  
293 database (*H. capsulatum* G186AR strain - ABBS02, and G217B strain – ABBT01). The  
294 alignment was performed as follows: additional 100-base upstream and downstream  
295 sequences; 10 minimum number of reads; 2 maximum number of mismatches; -2  
296 nonspecific match limit, and minimum fraction length of 0.7 for the genome mapping or 0.8  
297 for the RNA mapping. The minimum reads similarity mapped on the reference genome  
298 was 80%. Only uniquely mapped reads were considered in the analysis. The libraries were  
299 normalized per million and the expression values for the transcripts were recorded in  
300 RPKM (Reads Per Kilobase per Million), we also analyzed the other expression values -  
301 TPM (transcripts per million) and CPM (counts per million). The statistical test applied was  
302 the DGE (Differential Gene Expression). For the ncRNA the database used was the  
303 ncRNA from *Histoplasma capsulatum* (EnsemblFungi G186AR GCA\_000150115  
304 assembly ASM15011v1). The secondary structure was performed using the PPFold plugin  
305 in the CLC Genomics Workbench v. 10.1 using the default parameters. Analysis of the  
306 relationship between the profile of RNA sequences detected in this study with the protein  
307 composition of *H. capsulatum* EVs was based on the results recently obtained with strain  
308 G217B using a proteomic approach (25). The cellular RNA used in this analysis was  
309 assessed from the SRA database (SRR2015219 and SRR2015223) (28).

### 310 **Data access**

311 The data is deposited to the Sequence Read Archive (SRA) database under study  
312 accession number (PRJNA514312).

## 313 **Acknowledgments**

314 JDN was supported in part by NIH R01AI052733 and R21AI124797. MLR is  
315 currently on leave from the position of Associate Professor at the Microbiology Institute of  
316 the Federal University of Rio de Janeiro, Brazil. He was supported by grants from the  
317 Brazilian agency Conselho Nacional de Desenvolvimento Científico e Tecnológico (CNPq,  
318 grants 405520/2018-2, 440015/2018-9 and 301304/2017-3) and Fiocruz (grants VPPCB-  
319 007-FIO-18 and VPPIS-001-FIO18). RP was supported by FAPESP (grant 13/25950-10).  
320 The authors also acknowledge support from Coordenação de Aperfeiçoamento de  
321 Pessoal de Nível Superior (CAPES, Finance Code 001) and the Instituto Nacional de  
322 Ciência e Tecnologia de Inovação em Doenças de Populações Negligenciadas (INCT-  
323 IDPN).

## 324 **Conflict of interest**

325 The authors declare no conflict of interest.

## 326 **Figure and Table legends**

327 **Figure 1:** Gene ontology analysis. Pie chart representing the gene ontology of mRNA  
328 sequences enriched in EVs isolated from A) *H. capsulatum* G217B, n = 93. B) *H.*  
329 *capsulatum* G186AR, n=31.

330 **Figure 2:** RNA secondary structure. We used the ppFold software to predict the  
331 secondary structure from the putative miRNAs-like extracted from the obtained reads. The  
332 numbers in parenthesis represent the alignment E-value. The nucleotide colors represent  
333 the reliability percentage for each position of the RNA molecule (bottom figure). The  
334 stability value of each structure is given in kcal/mol.

335 **Figure 3:** Gene ontology analysis. Pie chart representing the gene ontology of mRNA  
336 sequences enriched in A) *H. capsulatum* cells and B) in EVs isolated from *H. capsulatum*.

337 **Table 1:** Fragments of mRNAs identified in the EVs isolated from the G217B and G186AR  
 338 strains. For some transcripts, there was an alignment in specific positions of the mRNA,  
 339 not covering the entire sequence. 5', 3' or M (middle of the mRNA); F or R orientation.

| Feature ID                     | G217B alignment | G186AR alignment | Sequence Description                         | GO                             |
|--------------------------------|-----------------|------------------|----------------------------------------------|--------------------------------|
| <b>Protein modification</b>    |                 |                  |                                              |                                |
| HCBG_03026                     | 5'R             | 5'R              | tetratricopeptide-like helical               | amino acid metabolic process   |
| HCBG_05660                     | MR              | -                | cmgc srpk protein kinase                     | protein modification process   |
| HCBG_05782                     | MF              | -                | dihydrofolate synthetase fol3                | cofactor metabolic process     |
| HCBG_06582                     | 5'F             | -                | aspartyl aminopeptidase                      | peptidase activity             |
| HCBG_07777                     | MF              | -                | mitochondrial processing peptidase alpha     | peptidase activity             |
| HCBG_08965                     | MF              | MF               | tyrosine phosphatase                         | protein modification process   |
| HCBG_09127                     | 3'R / 3'F       | -                | proteasome component c5                      | peptidase activity             |
| HCBG_09175                     | 5'F             | 5'F              | aspartic-type endopeptidase                  | peptidase activity             |
| HCBG_09182                     | MR              | -                | protein kinase                               | protein modification process   |
| HCBG_01228                     | 5'F             | -                | oxidative stress-induced growth inhibitor 2  | peptidase activity             |
| HCBG_01665                     | MF              | MF               | ph domain-containing protein                 | protein modification process   |
| HCBG_03811                     | MR              | 3'R              | heat shock protein hsp98                     | ATPase activity,               |
| HCBG_00544                     | MF              | -                | hsp104                                       | peptidase activity             |
| HCBG_02715                     | 3'F             | 3'F              | ubiquitin conjugating enzyme                 | ligase activity                |
| HCBG_05116                     | 3'F             | -                | ubiquitin family protein                     | protein modification process   |
| HCBG_07497                     | -               | 3'F              | protein                                      | peptidase activity             |
| <b>Carbohydrate metabolism</b> |                 |                  |                                              |                                |
| HCBG_00058                     | 5'R             | -                | mannosyl-oligosaccharide alpha- -mannosidase | catabolic process              |
| HCBG_00633                     | 3'R / 3'NS      | -                | class v chitinase                            | catabolic process              |
| HCBG_06620                     | 3'R             | 3'R              | transaldolase                                | carbohydrate metabolic process |
| <b>Lipid metabolism</b>        |                 |                  |                                              |                                |
| HCBG_02433                     | MF              | 5'F              | acyl carrier protein                         | biosynthetic process           |
| HCBG_01540                     | MF              | MF               | predicted protein                            | lipid metabolic process        |
| HCBG_04372                     | -               | 3'R              | gpi-anchor biosynthesis protein (pig-f)      | lipid metabolic process        |
| <b>Response to stress</b>      |                 |                  |                                              |                                |
| HCBG_02224                     | 3'F             | -                | general stress response protein whi2         |                                |
| HCBG_01643                     | 3'R             | -                | dna repair protein rad5                      | response to stress             |
| HCBG_06196                     | 3'R             | -                | thermotolerance protein                      |                                |
| <b>Translation</b>             |                 |                  |                                              |                                |
| HCBG_00808                     | MF              | MF               | 60s ribosomal protein l15                    |                                |

|                            |            |            |                               |                         |
|----------------------------|------------|------------|-------------------------------|-------------------------|
|                            |            |            | small nucleolar               |                         |
| HCBG_00853                 | 3'F        | -          | ribonucleoprotein complex     |                         |
| HCBG_01544                 | 5'R / F    | 5'R        | ribosome biogenesis protein   |                         |
| HCBG_02168                 | 5'F / MF   | -          | 60s ribosomal protein l25     | translation             |
| HCBG_02499                 | 5'R        | -          | rrna processing protein utp6  | oxidoreductase activity |
| HCBG_02762                 | 3'F        | -          | 60s ribosomal protein l31     | translation             |
|                            |            |            | prenyl cysteine carboxyl      |                         |
| HCBG_04580                 | MR         | -          | methyltransferase ste14       | mRNA processing         |
| HCBG_08644                 | 5'R        | -          | leucyl-trna synthetase        | translation             |
|                            |            |            | transcription initiation      |                         |
| HCBG_03984                 | 5'R        | -          | protein spt5                  | translation             |
|                            |            |            | u5 small nuclear              |                         |
|                            |            |            | ribonucleoprotein             | chromosome              |
| HCBG_04793                 | 5'R        | -          | component                     | organization            |
|                            |            |            | ribosome biogenesis protein   |                         |
| HCBG_06802                 | 5'R        | -          | ssf2                          |                         |
| <b>Signaling process</b>   |            |            |                               |                         |
|                            |            |            | mind kinetochore complex      |                         |
| HCBG_00598                 | 5'F / 5'NS | -          | component nnf1                | signal transduction     |
| HCBG_03086*                | 5'R / F    | -          | ste ste20 paka protein kinase | reproduction            |
| HCBG_04646*                | -          | 3'R        | protein ras-2                 | signal transduction     |
| <b>Oxidation-reduction</b> |            |            |                               |                         |
|                            |            |            | benzoate 4-monooxygenase      |                         |
| HCBG_00763                 | 3'R        | 3'R / 3'NS | cytochrome p450               | oxidoreductase activity |
|                            |            |            | tim-barrel enzyme family      |                         |
| HCBG_03251                 | 3'R / 3 F  | -          | protein                       | oxidoreductase activity |
|                            |            |            | flavin-containing             |                         |
| HCBG_04436                 | 5'R / 3'R  | -          | monooxygenase                 | oxidoreductase activity |
| HCBG_05481                 | 3'F        | 3'F        | like subfamily b member 4     | protein folding         |
|                            |            |            | fmn-binding split barrel-like |                         |
| HCBG_05591                 | 3'F        | 3'F        | protein                       | oxidoreductase activity |
| HCBG_06890                 | 5'F        | -          | glutaredoxin                  | homeostatic process     |
|                            |            |            | conserved hypothetical        |                         |
| HCBG_08366                 | 3'F        | -          | protein                       | oxidoreductase activity |
|                            |            |            | galactose oxidase beta-       |                         |
| HCBG_01233                 | 5'R / 5'F  | -          | propeller                     |                         |
| HCBG_00232                 | -          | 5'F        | tyrosinase                    | oxidoreductase activity |
| HCBG_03159                 | -          | MR         | ste ste7 mek1 protein kinase  | reproduction            |
| <b>Transport</b>           |            |            |                               |                         |
|                            |            |            | vacuolar abc heavy metal      |                         |
| HCBG_00485                 | 3'R        | -          | transporter                   | transmembrane           |
|                            |            |            |                               | transport               |
| HCBG_00680                 | 3'F        | -          | arsenical-resistance protein  | transmembrane           |
|                            |            |            |                               | transport               |
| HCBG_00850                 | MR         | -          | mfs monocarboxylate           | transmembrane           |
|                            |            |            |                               | transport               |
| HCBG_01089                 | 5'F / 5'NS | 5'R / 5'NS | mitochondrial carrier         | transport               |
|                            |            |            | endosomal cargo receptor      | vesicle-mediated        |
| HCBG_02374                 | 5'R        | -          |                               | transport               |
|                            |            |            | v-type proton atpase          | vesicle-mediated        |
| HCBG_02985                 | 5'R        | 5'R        | proteolipid subunit           | transport               |
|                            |            |            | mitochondrial dicarboxylate   | transmembrane           |
| HCBG_03067                 | 5'R        | 5'R        | carrier                       | transport               |

|                                     |           |           |                                                    |                             |
|-------------------------------------|-----------|-----------|----------------------------------------------------|-----------------------------|
| HCBG_03738                          | -         | MF        | exocyst complex component sec10                    | vesicle-mediated transport  |
| HCBG_04312                          | 3'F       | 5'R / 3'F | non-repetitive nucleoporin                         | nucleocytoplasmic transport |
| HCBG_04317                          | 5'F       | -         | mrna transport regulator                           | transport                   |
| HCBG_04719                          | 5'F       | -         | nucleoporin                                        |                             |
| HCBG_04608                          | 3'R       | -         | mfs transporter                                    | transmembrane transport     |
| HCBG_05671                          | MR        | -         | actin associated protein                           | vesicle-mediated transport  |
| HCBG_05941                          | 5'F       | 5'R       | potassium uptake protein                           | transmembrane transport     |
| HCBG_05942                          | MR        | -         | potassium uptake protein                           | transmembrane transport     |
| HCBG_06437                          | MF        | MF        | oligopeptide transporter                           | transport                   |
| HCBG_06658                          | MR        | -         | px domain-containing protein                       | transmembrane transport     |
| HCBG_07112                          | MF        | -         | ap-2 adaptor complex subunit                       | vesicle-mediated transport  |
| HCBG_07566                          | 3'R       | 3'R / MR  | actin cytoskeleton-regulatory complex protein pan1 | vesicle-mediated transport  |
| HCBG_08252*                         | 5'F       | -         | mfs multidrug transporter                          | transmembrane transport     |
| HCBG_09093                          | 5'R       | -         | kinetoplast-associated protein kap                 | transmembrane transport     |
| HCBG_09150                          | 5'R / 3'R | -         | cap binding protein                                | transport                   |
| HCBG_04513                          | 5'F       | -         | 3-oxoacyl-acyl-carrier-protein synthase            |                             |
| <b>DNA metabolism or biogenesis</b> |           |           |                                                    |                             |
| HCBG_00397                          | -         | MF        | phd finger domain                                  | chromosome organization     |
| HCBG_00799                          | 5'F       | 5'F       | transcriptional regulator ngg1                     | peptidase activity          |
| HCBG_01145                          | 5'R       | 5'R / 3'F | c6 zinc finger domain-containing protein           | biosynthetic process        |
| HCBG_02996                          | 3'F       | -         | recombination hotspot-binding protein              | DNA metabolic process       |
| HCBG_01721                          | 3'F       | -         | nitrogen assimilation transcription factor nira    | chromosome organization     |
| HCBG_03125                          | -         | MF        | white collar                                       | signal transduction         |
| HCBG_03879                          | MR        | MR        | dna-directed rna polymerase i subunit              | biosynthetic process        |
| HCBG_04485                          | -         | 3'F       | centromere protein cenp-o                          | chromosome organization     |
| HCBG_04625                          | MR        | -         | c6 finger domain                                   | biosynthetic process        |
| HCBG_04221                          | 3'R       | -         | chromatin remodeling complex subunit               | helicase activity           |
| HCBG_05411                          | 3'R       | 3'R       | transcription factor stea                          | reproduction                |
| HCBG_05417                          | MF        | -         | elongator complex protein 3                        | biosynthetic process        |
| HCBG_05986                          | 5'F       | -         | g1 s regulator                                     | DNA metabolic process       |
| HCBG_05814                          | 3'R       | 3'R       | histone h2a                                        | chromosome organization     |

|                               |           |           |                                               |                                     |
|-------------------------------|-----------|-----------|-----------------------------------------------|-------------------------------------|
| HCBG_06244                    | -         | MF        | double-strand break repair protein            | DNA metabolic process, reproduction |
| HCBG_07395                    | MR        | -         | cp2 transcription factor                      | biosynthetic process                |
| HCBG_07428                    | 3'F       | -         | caf1 family ribonuclease c2h2 finger domain   | biosynthetic process                |
| HCBG_09164                    | MF        | MF        | transcription factor                          | biosynthetic process                |
| HCBG_00846                    | 5'F       | -         | transcription factor tau55-like protein       |                                     |
| HCBG_04340                    | 3'R       | 3'R       | formamidopyrimidine-dna glycosylase           | DNA metabolic process               |
| HCBG_01534                    | MF        | MF        | telomere length regulation protein elg1       | ion binding, lipid binding          |
| HCBG_06146                    | 5'R       | 5'R       | telomerase-binding protein est1a              |                                     |
| HCBG_07560                    | 5'R / 5'F | 5'R / 5'F | dna repair protein protein                    |                                     |
| HCBG_05625                    | 3'R       | 3'R       | p60-like cell-wall                            |                                     |
| HCBG_09024                    | MR        | -         | hlh transcription factor                      |                                     |
| HCBG_06915                    | 5'F       | 5'F       | proline-rich protein -15                      | chromosome segregation              |
| <b>Other/Unknown function</b> |           |           |                                               |                                     |
| HCBG_00048                    | 5'R       | 5'R       | hypothetical protein HCBG_00048               |                                     |
| HCBG_00453                    | 5'R       | -         | miz zinc finger protein                       | ion binding                         |
| HCBG_00947                    | 3'F       | -         | predicted protein                             |                                     |
| HCBG_00975                    | 5'R       | 5'R       | atpase aaa-5 protein                          | ion binding                         |
| HCBG_01015                    | MF        | MF        | predicted protein                             |                                     |
| HCBG_01082                    | 3'R / 3'F | 3'R       | zinc knuckle domain protein                   |                                     |
| HCBG_01086                    | 5'R       | -         | predicted protein                             |                                     |
| HCBG_01127                    | 5'R / 3'R | -         | predicted protein                             |                                     |
| HCBG_01146                    | MF        | -         | predicted protein                             |                                     |
| HCBG_01161                    | MF        | -         | predicted protein                             |                                     |
| HCBG_01256                    | 3'R       | -         | conserved hypothetical protein                |                                     |
| HCBG_01258                    | MR        | -         | predicted protein                             |                                     |
| HCBG_01500                    | MR        | -         | predicted protein                             |                                     |
| HCBG_01656                    | MF        | -         | predicted protein                             |                                     |
| HCBG_01888                    | 3'R       | 3'R       | conserved hypothetical protein                |                                     |
| HCBG_01952                    | 3'F       | -         | conserved hypothetical protein                |                                     |
| HCBG_02098                    | 5'R       | -         | protein                                       |                                     |
| HCBG_02107                    | 5'F       | -         | predicted protein                             |                                     |
| HCBG_02158                    | -         | 3'F       | conserved hypothetical protein                |                                     |
| HCBG_02464                    | 3'R / 3'F | 3'NS      | carbohydrate-binding module family 48 protein |                                     |
| HCBG_02569                    | MR / MF   | MF        | predicted protein                             |                                     |
| HCBG_02659                    | MR / MF   | MR        | predicted protein                             |                                     |
| HCBG_02697                    | 3'R       | 3'R       | predicted protein                             |                                     |
| HCBG_02981                    | MF        | -         | phosphotransferase enzyme family protein      |                                     |
| HCBG_02986                    | MF        | 5'F       | predicted protein                             |                                     |
| HCBG_03093                    | MR        | -         | ph domain protein                             |                                     |

|            |           |          |                                                           |                             |
|------------|-----------|----------|-----------------------------------------------------------|-----------------------------|
| HCBG_03374 | MF        | MF       | glutathione transferase conserved hypothetical protein    | helicase activity           |
| HCBG_03658 | 3'R / 3F  | -        | predicted protein                                         |                             |
| HCBG_03692 | 3'R / 3F  | -        | predicted protein                                         |                             |
| HCBG_03693 | MR / MF   | MR / MF  | predicted protein                                         |                             |
| HCBG_03805 | MF        | MF       | mtdna inheritance protein                                 |                             |
| HCBG_03899 | MR        | MR / 3'R | wd repeat protein                                         |                             |
| HCBG_03911 | 3'R       | 3'R      | protein                                                   |                             |
| HCBG_03913 | MR        | -        | hypothetical protein HCBG_03913                           |                             |
| HCBG_03980 | MR        | -        | phosphatidylserine decarboxylase                          |                             |
| HCBG_04009 | MR        | -        | hypothetical protein HCBG_04009                           |                             |
| HCBG_04186 | MR        | -        | conserved hypothetical protein                            |                             |
| HCBG_04193 | 3'R       | 3'R      | conserved hypothetical protein                            |                             |
| HCBG_04201 | 3'F       | -        | hypothetical protein HCBG_04201                           |                             |
| HCBG_04208 | 3'F       | 3'F      | conserved hypothetical protein                            |                             |
| HCBG_04365 | MF        | -        | hypothetical protein HCBG_04365                           |                             |
| HCBG_04371 | 5'R / 5'F | -        | bifunctional uridylyltransferase uridylyl-removing enzyme |                             |
| HCBG_04380 | 3'R       | 3'R      | predicted protein                                         |                             |
| HCBG_04393 | 3'R       | -        | protein                                                   |                             |
| HCBG_04452 | 3'R       | 3'R      | predicted protein                                         |                             |
| HCBG_04780 | 5'R       | 5'R      | bromodomain containing protein                            |                             |
| HCBG_04887 | -         | MR       | predicted protein                                         |                             |
| HCBG_05336 | 5'R       | -        | upf0160 domain protein                                    |                             |
| HCBG_05404 | 3'R / 3'F | -        | predicted protein                                         |                             |
| HCBG_05580 | 3'R       | -        | methyltransferase domain-containing protein               |                             |
| HCBG_05638 | 5'R       | -        | predicted protein                                         |                             |
| HCBG_05703 | 5'R       | -        | conserved hypothetical protein                            |                             |
| HCBG_05744 | 5'F       | -        | t-complex protein 1 subunit beta                          |                             |
| HCBG_05763 | 3'R       | 3'F      | conserved hypothetical protein                            |                             |
| HCBG_05878 | 3'F       | -        | hypothetical protein HCBG_05878                           |                             |
| HCBG_06018 | 5'F       | -        | cytomegalovirus gh-receptor family                        |                             |
| HCBG_06054 | MR        | -        | phosphotransferase family protein                         | ion binding,kinase activity |
| HCBG_06071 | MF        | MF       | protein                                                   |                             |



|            |           |           |                            |                          |
|------------|-----------|-----------|----------------------------|--------------------------|
|            |           |           | conserved hypothetical     |                          |
| HCBG_06082 | MR        | -         | protein                    |                          |
| HCBG_06114 | 3'F       | -         | protein                    |                          |
| HCBG_06176 | 3'F       | -         | kh domain protein          | RNA binding              |
|            |           |           | nonsense-mediated mrna     |                          |
| HCBG_06239 | -         | 5'R       | decay protein              |                          |
| HCBG_06270 | MR        | -         | predicted protein          |                          |
|            |           |           | f-box domain-containing    |                          |
| HCBG_06364 | MR        | -         | protein                    |                          |
| HCBG_06436 | MF        | -         | predicted protein          |                          |
| HCBG_06661 | -         | 5'NS      | predicted protein          |                          |
| HCBG_06677 | 3'F       | -         | predicted protein          |                          |
| HCBG_06927 | 3'R / 3'F | -         | predicted protein          |                          |
| HCBG_07002 | 5'R / 5'F | 5'R / 5'F | ketoreductase              |                          |
| HCBG_07065 | 5'F       | -         | predicted protein          |                          |
| HCBG_07214 | 5'R       | 5'R       | predicted protein          |                          |
| HCBG_07247 | MR        | -         | acyltransferase 3          | transferring acyl groups |
|            |           |           | hypothetical protein       |                          |
| HCBG_07296 | MR        | MR        | HCBG_07296                 |                          |
| HCBG_07377 | MF        | MR        | predicted protein          |                          |
|            |           |           | rhomboid family membrane   |                          |
| HCBG_07484 | 3'F       | -         | protein                    | peptidase activity       |
|            |           | MR / MF / |                            |                          |
| HCBG_07611 | MR / MF   | MNS       | protein                    |                          |
| HCBG_07676 | 3'R / 3'F | -         | lyr family protein         |                          |
| HCBG_07802 | 3'R / 3'F | 3'R / 3'F | predicted protein          |                          |
| HCBG_07811 | 3'F       | 3'F       | predicted protein          |                          |
|            |           |           | duf833 domain protein      | protein complex          |
| HCBG_08059 | MR        | MF        |                            | assembly                 |
|            |           |           | sucrase ferredoxin domain- |                          |
| HCBG_08505 | 3'F       | -         | containing protein         |                          |
| HCBG_08661 | MF        | MF        | predicted protein          |                          |
| HCBG_08693 | 3'R       | -         | set domain protein         |                          |
| HCBG_08838 | 5'R       | -         | ww domain                  |                          |
| HCBG_08850 | 5'R       | -         | integral membrane protein  |                          |
| HCBG_09013 | 5'F       | 5'F       | predicted protein          |                          |
|            |           |           | conserved hypothetical     |                          |
| HCBG_09099 | 5'R       | 5'R       | protein                    |                          |
| HCBG_09144 | MF        | -         | predicted protein          |                          |

340

341

342 **Table 2:** Classes of ncRNA sequences identified in EV preparations from *H. capsulatum*  
 343 strains G186AR and G217B.

|          | ncRNA    | Hc186    | Hc217 |   |
|----------|----------|----------|-------|---|
| rRNA     | 15S_rRNA | -        | X     |   |
|          | NTS1-2   | X        | -     |   |
|          | RDN18-1  | X        | X     |   |
|          | RDN18-2  | X        | X     |   |
|          | RDN25-1  | X        | -     |   |
|          | RDN25-2  | X        | X     |   |
|          | RDN37-1  | X        | -     |   |
|          | RDN37-2  | X        | -     |   |
|          | RDN5-1   | X        | X     |   |
|          | RDN5-2   | X        | X     |   |
|          | RDN5-3   | X        | X     |   |
|          | RDN5-4   | X        | X     |   |
|          | RDN5-5   | X        | X     |   |
|          | RDN5-6   | X        | X     |   |
|          | RDN58-1  | X        | X     |   |
|          | RDN58-2  | X        | X     |   |
|          | ncRNA    | RUF21    | X     | X |
|          | snoRNA   | snR54    | X     | X |
|          | tRNA     | tRNA-Ser | -     | X |
| tRNA-Met |          | -        | X     |   |
| tRNA-Gln |          | -        | X     |   |
| tRNA-Cys |          | -        | X     |   |
| tRNA-Ser |          | X        | X     |   |
| tRNA-Pro |          | X        | X     |   |
| tRNA-Ala |          | X        | X     |   |
| tRNA-Thr |          | X        | X     |   |
| tRNA-Ala |          | X        | X     |   |
| tRNA-Phe |          | X        | X     |   |
| tRNA-Ala |          | X        | X     |   |
| tRNA-Asn |          | X        | X     |   |
| tRNA-Met |          | X        | X     |   |
| tRNA-Arg |          | X        | X     |   |
| tRNA-Trp |          | X        | X     |   |
| tRNA-Gly |          | X        | X     |   |
| tRNA-Asp |          | X        | X     |   |
| tRNA-Pro |          | X        | X     |   |
| tRNA-Thr |          | X        | X     |   |
| tRNA-His |          | X        | X     |   |
| tRNA-Glu |          | X        | X     |   |
| tRNA-Gln |          | X        | X     |   |
| tRNA-Tyr |          | X        | X     |   |
| tRNA-Gln | X        | X        |       |   |
| tRNA-Gly | X        | -        |       |   |
| tRNA-Lys | X        | -        |       |   |
| tRNA-Ile | X        | -        |       |   |
| tRNA-Leu | X        | -        |       |   |
| tRNA-Met | X        | -        |       |   |

|          |   |   |
|----------|---|---|
| tRNA-Gly | X | - |
| tRNA-Ile | X | - |
| tRNA-Thr | X | - |
| tRNA-Lys | X | - |
| tRNA-Met | X | - |
| tRNA-Val | X | - |
| tRNA-Phe | X | - |
| tRNA-Ile | X | - |
| tRNA-Sec | X | - |
| tRNA-Asp | X | - |
| tRNA-Thr | X | - |
| tRNA-Ile | X | - |
| tRNA-Ser | X | - |
| tRNA-Ser | X | - |
| tRNA-Arg | X | - |
| tRNA-Lys | X | - |
| tRNA-Leu | X | - |
| tRNA-Ser | X | - |
| tRNA-Leu | X | - |
| tRNA-Ala | X | - |
| tRNA-Cys | X | - |
| tRNA-Thr | X | - |
| tRNA-His | X | - |
| tRNA-Tyr | X | - |
| tRNA-Ser | X | - |
| tRNA-Leu | X | - |
| tRNA-Lys | X | - |
| tRNA-Ala | X | - |
| tRNA-Pro | X | - |
| tRNA-Arg | X | - |
| tRNA-Glu | X | - |

344

345

346 **Table 3:** Proteins related to RNA metabolism identified in EV preparations from *H.*  
 347 *capsulatum* strain G217B.

| Majority protein IDs | Protein names                                                   | Gene names      |
|----------------------|-----------------------------------------------------------------|-----------------|
| CONMG7               | QDE2 protein                                                    | HCBG_03944      |
| COP170               | Cap binding protein                                             | HCBG_09150      |
| CONJ23               | Exosome complex exonuclease RRP4                                | HCBG_03153      |
| CONM03               | Exosome complex exonuclease RRP45                               | HCBG_04533      |
| CONCT3               | KH domain RNA binding protein                                   | HCBG_00929      |
| CONUH0               | KH domain RNA-binding protein                                   | HCBG_07001      |
| CONIU5               | KH domain-containing protein                                    | HCBG_02352      |
| CONUS5               | mRNA 3'-end-processing protein rna14                            | HCBG_06689      |
| CONNW0               | mRNA cleavage and polyadenylation factor CLP1                   | CLP1 HCBG_04840 |
| CONP91               | mRNA decapping enzyme                                           | HCBG_04971      |
| CONC87               | mRNA export factor mex67                                        | HCBG_00733      |
| CONJ33               | Nuclear and cytoplasmic polyadenylated RNA-binding protein pub1 | HCBG_03163      |
| CONQQ9               | Poly(A)+ RNA export protein                                     | HCBG_05339      |
| CONSS5               | Polyadenylate-binding protein (PABP)                            | HCBG_06205      |
| CONKR4               | Ribonucleoprotein                                               | HCBG_03744      |
| CONSY4               | RNA binding domain-containing protein                           | HCBG_06264      |
| CONWH9               | RNA-binding protein                                             | HCBG_07509      |
| CONB22               | RNA-binding protein                                             | HCBG_00318      |
| CONPA1               | RNA-binding protein Nrd1                                        | HCBG_04981      |
| CONZI9               | RNA-binding protein Prp24                                       | HCBG_08569      |
| CONTZ5               | RNA-binding protein Snd1                                        | HCBG_06625      |
| CONMQ0               | RNP domain-containing protein                                   | HCBG_04027      |
| CONLQ4               | RRM domain-containing protein                                   | HCBG_04434      |
| CONJ27               | Transcription elongation factor Spt6                            | HCBG_03157      |
| CONTQ1               | Transcription initiation factor TFIID complex 60 kDa subunit    | HCBG_06531      |
| CONRU6               | U1 snRNP-associated protein Usp106                              | HCBG_05876      |
| CONZZ2               | U1 snRNP-associated protein Usp107                              | HCBG_08722      |
| CONBS3               | U2 snRNP auxiliary factor large subunit                         | HCBG_00569      |
| CONAD4               | U3 small nucleolar RNA-associated protein                       | HCBG_00080      |
| CONZA3               | U3 small nucleolar RNA-associated protein 22                    | HCBG_08483      |
| CONLW4               | U3 snoRNP-associated protein Rrp5                               | HCBG_04494      |
| COPOR0               | U6 snRNA-associated Sm-like protein LSm2                        | HCBG_08990      |
| COP041               | 30S ribosomal protein S10                                       | HCBG_08883      |
| CONFV8               | 40S ribosomal protein S15                                       | HCBG_01774      |
| CONX47               | 40S ribosomal protein S18                                       | HCBG_08039      |
| CONZD2               | 40S ribosomal protein S20                                       | HCBG_08512      |
| CONBD0               | 40S ribosomal protein S21                                       | HCBG_00426      |
| CONUD0               | 40S ribosomal protein S3                                        | HCBG_06961      |
| CONLP3               | 40S ribosomal protein S4                                        | HCBG_04423      |
| CONF40               | 40S ribosomal protein S5A                                       | HCBG_01506      |
| CONLR5               | 40S ribosomal protein S9                                        | HCBG_04445      |
| CONTH6               | 5'-3' exoribonuclease 1 (EC 3.1.13.-)                           | HCBG_06456      |
| CONKI2               | 60S ribosomal protein L1                                        | HCBG_03662      |
| CONNL2               | 60S ribosomal protein L3                                        | HCBG_04742      |
| CONCP3               | 60S ribosomal protein L30                                       | HCBG_00889      |

|        |                                                                    |                 |
|--------|--------------------------------------------------------------------|-----------------|
| CONRD6 | 60S ribosomal protein L5                                           | HCBG_05566      |
| CONQR6 | 60S ribosomal protein L9B                                          | HCBG_05346      |
| CONPC0 | Acyl-RNA-complex subunit                                           | HCBG_05000      |
| CONKL8 | Alanine--tRNA ligase (EC 6.1.1.7) (Alanyl-tRNA synthetase) (AlaRS) | ALA1 HCBG_03698 |
| CONCS0 | Alternative oxidase (EC 1.-.-.)                                    | HCBG_00916      |
| COND66 | Arginyl-tRNA synthetase                                            | HCBG_01062      |
| CONT82 | Asparagine-rich protein                                            | HCBG_06362      |
| CONP94 | Asparaginyl-tRNA synthetase                                        | HCBG_04974      |
| CONGY7 | Aspartyl-tRNA synthetase                                           | HCBG_02609      |
| CONNJ3 | ATP-dependent helicase NAM7                                        | HCBG_04723      |
| CONIT7 | ATP-dependent RNA helicase DOB1                                    | HCBG_02344      |
| CONAN2 | ATP-dependent RNA helicase EIF4A                                   | HCBG_00178      |
| CONFC7 | Cell cycle control protein                                         | HCBG_01593      |
| CONT49 | Cleavage and polyadenylation specific factor 5                     | HCBG_06329      |
|        |                                                                    | CLU1 TIF31      |
| CONW18 | Clustered mitochondria protein homolog (Protein TIF31 homolog)     | HCBG_07348      |
| CONTW5 | Cysteinyl-tRNA synthetase                                          | HCBG_06595      |
| CONZE4 | D-aminoacyl-tRNA deacylase (EC 3.1.1.-) (EC 3.1.1.96)              | HCBG_08524      |
| CONSH0 | DNA-directed RNA polymerase II polypeptide                         | HCBG_06100      |
| CONB61 | DNA-directed RNA polymerase subunit beta (EC 2.7.7.6)              | HCBG_00357      |
| CONKS3 | Elicitor protein                                                   | HCBG_03753      |
| CONRY6 | Eukaryotic peptide chain release factor GTP-binding subunit        | HCBG_05916      |
| COP0X7 | Eukaryotic translation initiation factor 3 subunit D (eIF3d)       | HCBG_09057      |
| CONEV9 | Fibrillarin                                                        | HCBG_01425      |
| CONZT8 | Glutaminyl-tRNA synthetase                                         | HCBG_08668      |
| CONKS5 | Glutamyl-tRNA synthetase                                           | HCBG_03755      |
| CONE28 | Glycyl-tRNA synthetase                                             | HCBG_02121      |
| CONN35 | Histidyl-tRNA synthetase                                           | HCBG_04162      |
| CONL66 | Isoleucyl-tRNA synthetase,cytoplasmic                              | HCBG_03896      |
| CONZR4 | Leucyl-tRNA synthetase                                             | HCBG_08644      |
| CONH95 | Leucyl-tRNA synthetase                                             | HCBG_02717      |
| CONI62 | Lysine--tRNA ligase (EC 6.1.1.6) (Lysyl-tRNA synthetase)           | HCBG_03034      |
| CONMS8 | Mitotic control protein dis3                                       | HCBG_04055      |
| CONBJ8 | mRNA splicing protein PRP8                                         | HCBG_00494      |
| CONY83 | NAM9+ protein                                                      | HCBG_07877      |
| CONG69 | Nucleic acid-binding protein                                       | HCBG_01885      |
| CONUD1 | Phenylalanyl-tRNA synthetase subunit beta                          | HCBG_06962      |
| CONBD1 | Phenylalanyl-tRNA synthetase subunit beta cytoplasmic              | HCBG_00427      |
| CONUP1 | Polymerase II polypeptide D                                        | HCBG_06655      |
| CONNC4 | Pre-mRNA-processing factor 39                                      | HCBG_04251      |
| CONJB4 | Pre-mRNA-processing protein prp40                                  | HCBG_03244      |
| CONXM8 | Pre-mRNA-splicing factor                                           | HCBG_08220      |
| CONLW7 | Prolyl-tRNA synthetase                                             | HCBG_04497      |
| CONW72 | Ribonuclease T2-like protein                                       | HCBG_07402      |
| CONEF9 | Ribonuclease Z                                                     | HCBG_01275      |
| CONIJ3 | Ribosomal biogenesis protein Gar2                                  | HCBG_02250      |
| CONHN4 | Ribosomal protein L14                                              | HCBG_02856      |
| CONI43 | Ribosomal protein L6                                               | HCBG_03015      |
| CONVX9 | Ribosomal protein S5                                               | HCBG_07309      |
| CONN82 | RNA helicase (EC 3.6.4.13)                                         | HCBG_04209      |
| CONEY2 | RNA polymerase II largest subunit                                  | HCBG_01448      |
| CONL28 | RNA polymerase subunit                                             | HCBG_03858      |

|        |                                                              |                 |
|--------|--------------------------------------------------------------|-----------------|
| CONYA7 | RNase H domain-containing protein                            | HCBG_07901      |
| CONH14 | RNP domain-containing protein                                | HCBG_02636      |
| CONDP9 | RNP domain-containing protein                                | HCBG_01992      |
| CONC99 | SAM domain-containing protein                                | HCBG_00745      |
| CONE91 | Seryl-tRNA synthetase                                        | HCBG_02184      |
| CONSR2 | Signal recognition particle subunit SRP68 (SRP68)            | HCBG_06192      |
| CONDB1 | Small nuclear ribonucleoprotein                              | HCBG_01107      |
| CONTA0 | Splicing factor 3A subunit 3                                 | HCBG_06380      |
| CONUB9 | Splicing factor 3B                                           | HCBG_06950      |
| CONBR2 | Splicing factor 3B subunit 1                                 | HCBG_00558      |
| CONGZ9 | Threonyl-tRNA synthetase                                     | HCBG_02621      |
| CONSB0 | Transfer RNA-Trp synthetase                                  | HCBG_06040      |
| CONL23 | tRNA (Cytosine-5-)-methyltransferase NCL1                    | HCBG_03853      |
| CONUP2 | tRNA (guanine(37)-N1)-methyltransferase (EC 2.1.1.228)       | TRM5 HCBG_06656 |
| CONEY0 | tRNA guanylyltransferase                                     | HCBG_01446      |
| CONJJ2 | tRNA ligase (EC 6.5.1.3)                                     | HCBG_03322      |
| CONM44 | tRNA pseudouridine synthase                                  | HCBG_04574      |
| CONSG9 | Tyrosine--tRNA ligase (EC 6.1.1.1) (Tyrosyl-tRNA synthetase) | HCBG_06099      |
| CONP46 | Uncharacterized protein                                      | HCBG_04926      |
| CONZF6 | Uncharacterized protein                                      | HCBG_08536      |
| CONIA9 | Uncharacterized protein                                      | HCBG_03081      |
| CONMF3 | Uncharacterized protein                                      | HCBG_04683      |
| CONPI9 | Uncharacterized protein                                      | HCBG_05069      |
| CONKI6 | Uncharacterized protein                                      | HCBG_03666      |
| CONF97 | Uncharacterized protein                                      | HCBG_01563      |
| CONEJ1 | Uncharacterized protein                                      | HCBG_01307      |
| CONEC3 | Uncharacterized protein                                      | HCBG_01239      |
| CONJN9 | Uncharacterized protein                                      | HCBG_03369      |
| CONYC3 | Uncharacterized protein                                      | HCBG_07917      |
| CONIB5 | Uncharacterized protein                                      | HCBG_03087      |
| CONYN4 | Uncharacterized protein                                      | HCBG_08264      |
| CONBT4 | Uncharacterized protein                                      | HCBG_00580      |
| CONKE4 | Uncharacterized protein                                      | HCBG_03624      |
| CONGB7 | Uncharacterized protein                                      | HCBG_02389      |
| CONM01 | Uncharacterized protein                                      | HCBG_04531      |
| CONG47 | Uncharacterized protein                                      | HCBG_01863      |
| CONEU7 | Uncharacterized protein                                      | HCBG_01413      |
| CONG27 | Valyl-tRNA synthetase                                        | HCBG_01843      |
| COP019 | Vip1 protein                                                 | HCBG_08749      |
| CONG23 | Ribosome biogenesis protein RPF2                             | HCBG_01839      |
| CONGE8 | Ribosome biogenesis protein TSR3                             | TSR3 HCBG_02420 |
| CONAE4 | Ribosome biogenesis protein YTM1                             | YTM1 HCBG_00090 |

348

349

350 **Table 4:** Proteins associated to the RNAi machinery in *H. capsulatum* G186AR EVs  
 351 compared to *S. pombe* and *N. crassa*.

| Protein                                                                           | <i>H. capsulatum</i> product    | G186AR ID  | E-value   | Identity | Positives |
|-----------------------------------------------------------------------------------|---------------------------------|------------|-----------|----------|-----------|
| NP_587782.1 argonaute [Schizosaccharomyces pombe]                                 | QDE2 protein                    | HCBG_03944 | 1.00E-85  | 28%      | 45%       |
| ESA42122.1 post-transcriptional silencing protein QDE-2 [Neurospora crassa OR74A] | QDE2 protein                    | HCBG_03944 | 1.00E-178 | 37%      | 53%       |
| NP_588215.2 dicer [Schizosaccharomyces pombe]                                     | Dicer-like protein              | HCBG_01751 | 1.00E-113 | 28%      | 44%       |
| EAA34302.3 dicer-like protein 2 [Neurospora crassa OR74A]                         | Dicer-like protein 2            | HCBG_01136 | 3.00E-97  | 31%      | 49%       |
| XP_959047.1 RNA-dependent RNA polymerase [Neurospora crassa OR74A]                | RNA-dependent RNA polymerase    | HCBG_06604 | 3.00E-92  | 31%      | 46%       |
| XP_964030.3 RecQ family helicase [Neurospora crassa OR74A]                        | Dicer-like protein              | HCBG_01751 | 0.00E+00  | 45%      | 60%       |
| ABQ45366.1 QDE-2-interacting protein [Neurospora crassa]                          | QDE-2-interacting protein (QIP) | HCBG_07373 | 2.00E-50  | 27%      | 43%       |

352

## 353 References

- 354 1. Heydon K, Zaoutis TE, Chu JH, Feudtner C, Walsh TJ. 2006. Hospitalizations for Endemic  
 355 Mycoses: A Population-Based National Study. Clin Infect Dis 42:822–825.
- 356 2. Adenis AA, Aznar C, Couppié P. 2014. Histoplasmosis in HIV-Infected Patients: A Review of  
 357 New Developments and Remaining Gaps. Curr Trop Med Reports.
- 358 3. Prado M, da Silva MB, Laurenti R, Travassos LR, Taborda CP. 2009. Mortality due to systemic  
 359 mycoses as a primary cause of death or in association with AIDS in Brazil: A review from  
 360 1996 to 2006. Mem Inst Oswaldo Cruz 104:513–521.
- 361 4. Cordeiro RA, Pereira JF, Caetano ÉP, Castelo-Branco DSCM, Rocha MFG, Sidrim JJC, Camargo  
 362 ZP, Fechine MAB, Monteiro AJ, Lima RAC, Mesquita JRL, Brilhante RSN. 2012.  
 363 Histoplasmosis in HIV-positive patients in Ceará, Brazil: clinical-laboratory aspects and in  
 364 vitro antifungal susceptibility of Histoplasma capsulatum isolates. Trans R Soc Trop Med Hyg  
 365 106:484–488.
- 366 5. Lopes-Bezerra LM, Schubach A, Costa RO. 2006. Sporothrix schenckii and Sporotrichosis. An  
 367 Acad Bras Cienc.
- 368 6. Carme B, Bessieres M-H, Adenis A, Fillaux J, Couppie P, Demar M, Menard S, Iriart X,  
 369 Chauvin P, Nacher M, Aznar C, Lavergne R-A, Blanchet D, Magnaval J-F, Berry A, Cassaing S.  
 370 2014. A complementary tool for management of disseminated Histoplasma capsulatum var.  
 371 capsulatum infections in AIDS patients. Int J Med Microbiol 304:1062–1065.
- 372 7. Albuquerque PC, Nakayasu ES, Rodrigues ML, Frases S, Casadevall A, Zancoppe-Oliveira RM,  
 373 Almeida IC, Nosanchuk JD. 2008. Vesicular transport in Histoplasma capsulatum: An  
 374 effective mechanism for trans-cell wall transfer of proteins and lipids in ascomycetes. Cell  
 375 Microbiol 10:1695–1710.
- 376 8. Matos Baltazar L, Sobreira TJP, Choi H, Nakayasu ES, Casadevall A, Nimrichter L, Nosanchuk  
 377 JD. 2016. Antibody Binding Alters the Characteristics and Contents of Extracellular Vesicles  
 378 Released by Histoplasma capsulatum. mSphere 1:1–17.

- 379 9. Rodrigues ML, Godinho RMC, Zamith-Miranda D, Nimrichter L. 2015. Traveling into Outer  
380 Space: Unanswered Questions about Fungal Extracellular Vesicles. *PLOS Pathog.*
- 381 10. Rodrigues ML, Nakayasu ES, Oliveira DL, Nimrichter L, Nosanchuk JD, Almeida IC, Casadevall  
382 A. 2008. Extracellular vesicles produced by *Cryptococcus neoformans* contain protein  
383 components associated with virulence. *Eukaryot Cell* 7:58–67.
- 384 11. Da Silva TA, Roque-Barreira MC, Casadevall A, Almeida F. 2016. Extracellular vesicles from  
385 *Paracoccidioides brasiliensis* induced M1 polarization in vitro. *Sci Rep* 6.
- 386 12. Rodrigues ML, Nimrichter L, Oliveira DL, Frases S, Miranda K, Zaragoza O, Alvarez M,  
387 Nakouzi A, Feldmesser M, Casadevall A. 2007. Vesicular polysaccharide export in  
388 *Cryptococcus neoformans* is a eukaryotic solution to the problem of fungal trans-cell wall  
389 transport. *Eukaryot Cell* 6:48–59.
- 390 13. Vallejo MC, Matsuo AL, Ganiko L, Medeiros LCS, Miranda K, Silva LS, Freymüller-  
391 Haapalainen E, Sinigaglia-Coimbra R, Almeida IC, Puccia R. 2011. The pathogenic fungus  
392 *Paracoccidioides brasiliensis* exports extracellular vesicles containing highly Immunogenic  $\alpha$ -  
393 galactosyl epitopes. *Eukaryot Cell* 10:343–351.
- 394 14. Gehrman U, Qazi KR, Johansson C, Hultenby K, Karlsson M, Lundeberg L, Gabrielsson S,  
395 Scheynius A. 2011. Nanovesicles from *malassezia sympodialis* and host exosomes induce  
396 cytokine responses - novel mechanisms for host-microbe interactions in atopic eczema.  
397 *PLoS One* 6.
- 398 15. Brown L, Wolf JM, Prados-Rosales R, Casadevall A. 2015. Through the wall: Extracellular  
399 vesicles in Gram-positive bacteria, mycobacteria and fungi. *Nat Rev Microbiol.*
- 400 16. Nimrichter L, De Souza MM, Del Poeta M, Nosanchuk JD, Joffe L, Tavares PDM, Rodrigues  
401 ML. 2016. Extracellular vesicle-associated transitory cell wall components and their impact  
402 on the interaction of fungi with host cells. *Front Microbiol.*
- 403 17. Peres da Silva R, Puccia R, Rodrigues ML, Oliveira DL, Joffe LS, César GV, Nimrichter L,  
404 Goldenberg S, Alves LR. 2015. Extracellular vesicle-mediated export of fungal RNA. *Sci Rep*  
405 5.
- 406 18. Rayner S, Bruhn S, Vallhov H, Andersson A, Billmyre RB, Scheynius A. 2017. Identification of  
407 small RNAs in extracellular vesicles from the commensal yeast *Malassezia sympodialis*. *Sci*  
408 *Rep* 7.
- 409 19. Tewarl RP, Berkhout FJ. 1972. Comparative pathogenicity of albino and brown types of  
410 *histoplasma capsulatum* for mice. *J Infect Dis.*
- 411 20. Mayfield JA, Rine J. 2007. The genetic basis of variation in susceptibility to infection with  
412 *Histoplasma capsulatum* in the mouse. *Genes Immun.*
- 413 21. Bevilacqua PC, Ritchey LE, Su Z, Assmann SM. 2016. Genome-Wide Analysis of RNA  
414 Secondary Structure. *Annu Rev Genet.*
- 415 22. Kertesz M, Iovino N, Unnerstall U, Gaul U, Segal E. 2007. The role of site accessibility in  
416 microRNA target recognition. *Nat Genet.*
- 417 23. Kertesz M, Wan Y, Mazor E, Rinn JL, Nutter RC, Chang HY, Segal E. 2010. Genome-wide  
418 measurement of RNA secondary structure in yeast. *Nature.*
- 419 24. Glisovic T, Bachorik JL, Yong J, Dreyfuss G. 2008. RNA-binding proteins and post-  
420 transcriptional gene regulation. *FEBS Lett.*
- 421 25. Baltazar LM, Zamith-Miranda D, Burnet MC, Choi H, Nimrichter L, Nakayasu ES, Nosanchuk  
422 JD. 2018. Concentration-dependent protein loading of extracellular vesicles released by  
423 *Histoplasma capsulatum* after antibody treatment and its modulatory action upon  
424 macrophages. *Sci Rep* 8.
- 425 26. Colmenares SU, Buker SM, Buhler M, Dlakić M, Moazed D. 2007. Coupling of Double-  
426 Stranded RNA Synthesis and siRNA Generation in Fission Yeast RNAi. *Mol Cell* 27:449–461.
- 427 27. Catalanotto C, Azzalin G, Macino G, Cogoni C. 2000. Gene silencing in worms and fungi.



- 428 Nature 404:245.
- 429 28. Gilmore SA, Voorhies M, Gebhart D, Sil A. 2015. Genome-Wide Reprogramming of  
430 Transcript Architecture by Temperature Specifies the Developmental States of the Human  
431 Pathogen *Histoplasma*. *PLoS Genet* 11.
- 432 29. da Silva RP, Martins S de T, Rizzo J, Dos Reis FCG, Joffe LS, Vainstein M, Kmetzsch L, Oliveira  
433 DL, Puccia R, Goldenberg S, Rodrigues ML, Alves LR. 2018. Golgi reassembly and stacking  
434 protein (GRASP) participates in vesicle-mediated RNA export in *Cryptococcus neoformans*.  
435 *Genes (Basel)*.
- 436 30. Batagov AO, Kurochkin I V. 2013. Exosomes secreted by human cells transport largely mRNA  
437 fragments that are enriched in the 3'-untranslated regions. *Biol Direct* 8.
- 438 31. Nicolás FE, de Haro JP, Torres-Martínez S, Ruiz-Vázquez RM. 2007. Mutants defective in a  
439 *Mucor circinelloides* dicer-like gene are not compromised in siRNA silencing but display  
440 developmental defects. *Fungal Genet Biol* 44:504–516.
- 441 32. Cervantes M, Calo S, Ruiz-Vázquez RM, Torres-Martínez S, Nicolás FE, de Haro JP. 2009. A  
442 Single dicer Gene Is Required for Efficient Gene Silencing Associated with Two Classes of  
443 Small Antisense RNAs in *Mucor circinelloides*. *Eukaryot Cell* 8:1486–1497.
- 444 33. Cervantes M, Vila A, Nicolás FE, Moxon S, de Haro JP, Dalmay T, Torres-Martínez S, Ruiz-  
445 Vázquez RM. 2013. A Single Argonaute Gene Participates in Exogenous and Endogenous  
446 RNAi and Controls Cellular Functions in the Basal Fungus *Mucor circinelloides*. *PLoS One* 8.
- 447 34. Nicolas FE, Moxon S, de Haro JP, Calo S, Grigoriev I V., Torres-Martínez S, Moulton V, Ruiz-  
448 Vázquez RM, Dalmay T. 2010. Endogenous short RNAs generated by Dicer 2 and RNA-  
449 dependent RNA polymerase 1 regulate mRNAs in the basal fungus *Mucor circinelloides*.  
450 *Nucleic Acids Res* 38:5535–5541.
- 451 35. Statello L, Maugeri M, Garre E, Nawaz M, Wahlgren J, Papadimitriou A, Lundqvist C, Lindfors  
452 L, Collén A, Sunnerhagen P, Ragusa M, Purrello M, Pietro C Di, Tigue N, Valadi H. 2018.  
453 Identification of RNA-binding proteins in exosomes capable of interacting with different  
454 types of RNA: RBP-facilitated transport of RNAs into exosomes. *PLoS One* 13.
- 455 36. Alonzi T, Weisz A, Battistelli C, Tarallo R, Tripodi M, Giurato G, Montaldo C, Santangelo L,  
456 Cicchini C, Mancone C. 2016. The RNA-Binding Protein SYNCRIP Is a Component of the  
457 Hepatocyte Exosomal Machinery Controlling MicroRNA Sorting. *Cell Rep* 17:799–808.
- 458 37. Sork H, Corso G, Krjutskov K, Johansson HJ, Nordin JZ, Wiklander OPB, Lee YXF, Westholm  
459 JO, Lehtiö J, Wood MJA, Mäger I, El Andaloussi S. 2018. Heterogeneity and interplay of the  
460 extracellular vesicle small RNA transcriptome and proteome. *Sci Rep* 8.
- 461 38. Marti M, Padmanabhan P, Ghiran I, Walch M, Kuo WP, Nilsson S, Brancucci NM, Ravel D,  
462 Trachtenberg A, Ma S, Mantel P-Y, Filgueira L, Huttenhower C, Hjelmqvist D, Ankarklev J,  
463 Ribeiro M, Grüning C, Duraisingh MT, Kharoubi-Hess S, Martinelli R. 2016. Infected  
464 erythrocyte-derived extracellular vesicles alter vascular function via regulatory Ago2-miRNA  
465 complexes in malaria. *Nat Commun* 7.
- 466 39. Ghildiyal M, Zamore PD. 2009. Small silencing RNAs: An expanding universe. *Nat Rev Genet*.
- 467 40. Drinnenberg IA, Weinberg DE, Xie KT, Mower JP, Wolfe KH, Fink GR, Bartel DP. 2009. RNAi in  
468 budding yeast. *Science (80- )* 326:544–550.
- 469 41. Pallotta M, Cogoni C, Sachs MS, Catalanotto C, Macino G, Vayssie L, ReFalo P. 2004.  
470 Redundancy of the Two Dicer Genes in Transgene-Induced Posttranscriptional Gene  
471 Silencing in *Neurospora crassa*. *Mol Cell Biol* 24:2536–2545.
- 472 42. Choudhary S, Liu Y, Cheng P, Maiti M, Lee H-C, Liu Q, He Q. 2007. A Double-Stranded-RNA  
473 Response Program Important for RNA Interference Efficiency. *Mol Cell Biol* 27:3995–4005.
- 474 43. Cogoni C, Macino G. 1999. Gene silencing in *Neurospora crassa* requires a protein  
475 homologous to RNA-dependent RNA polymerase. *Nature* 399:166–169.
- 476 44. Cogoni C, Macino G. 1999. Posttranscriptional gene silencing in *Neurospora* by a RecQ DNA

- 477 helicase. *Science* (80- ) 286:2342–2344.
- 478 45. Chicas A, Cogoni C, Macino G. 2004. RNAi-dependent and RNAi-independent mechanisms  
479 contribute to the silencing of RIPed sequences in *Neurospora crassa*. *Nucleic Acids Res*  
480 32:4237–4243.
- 481 46. Nolan T, Braccini L, Azzalin G, De Toni A, Macino G, Cogoni C. 2005. The post-transcriptional  
482 gene silencing machinery functions independently of DNA methylation to repress a LINE1-  
483 like retrotransposon in *Neurospora crassa*. *Nucleic Acids Res* 33:1564–1573.
- 484 47. Jiang N, Yang Y, Janbon G, Pan J, Zhu X. 2012. Identification and functional demonstration of  
485 miRNAs in the fungus *Cryptococcus neoformans*. *PLoS One* 7:e52734.
- 486 48. Selker EU, Lewis ZA, Gu W, Mello CC, Li L, Xue Z, Crosthwaite SK, Pertsemlidis A, Freitag M,  
487 Liu Y, Lee H-C. 2010. Diverse Pathways Generate MicroRNA-like RNAs and Dicer-  
488 Independent Small Interfering RNAs in Fungi. *Mol Cell* 38:803–814.
- 489 49. Bielska E, Sisquella MA, Aldeieg M, Birch C, O'Donoghue EJ, May RC. 2018. Pathogen-  
490 derived extracellular vesicles mediate virulence in the fatal human pathogen *Cryptococcus*  
491 *gattii*. *Nat Commun* 9.
- 492 50. Mitchell KF, Azadi P, Jaromin A, Sanchez H, Dominguez E, Andes DR, Mitchell A, Zarnowski  
493 R, Bernhardt J, Heiss C, Covelli AS. 2018. *Candida albicans* biofilm–induced vesicles confer  
494 drug resistance through matrix biogenesis. *PLOS Biol* 16:e2006872.
- 495 51. Rodrigues ML, Nimrichter L, Oliveira DL, Frases S, Miranda K, Zaragoza O, Alvarez M,  
496 Nakouzi A, Feldmesser M, Casadevall A. 2007. Vesicular polysaccharide export in  
497 *Cryptococcus neoformans* is a eukaryotic solution to the problem of fungal trans-cell wall  
498 transport. *Eukaryot Cell* 6:48–59.
- 499  
500

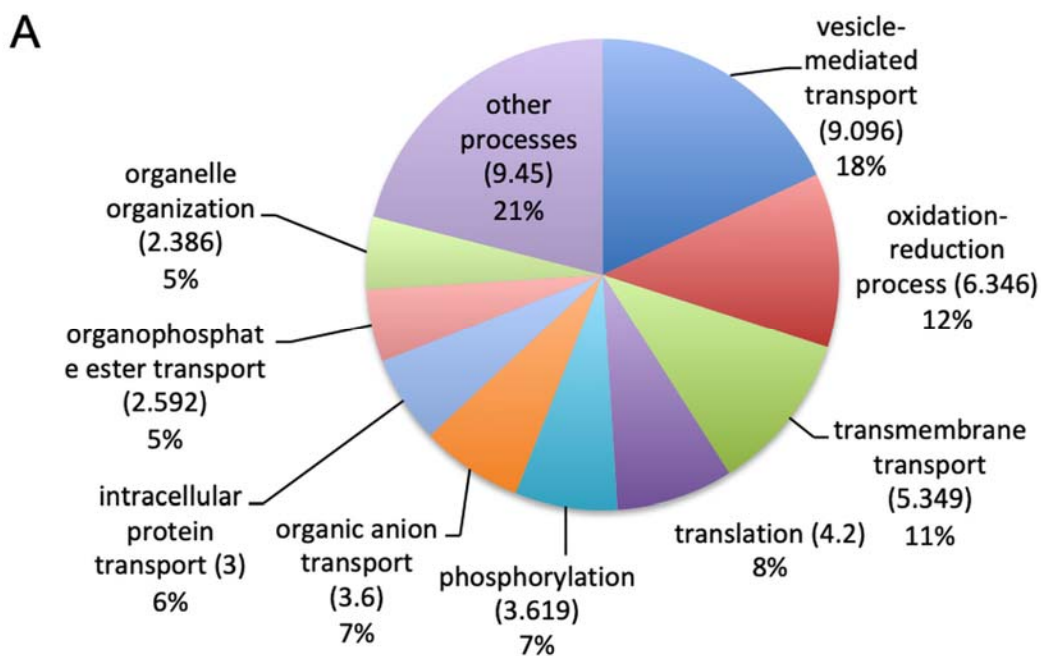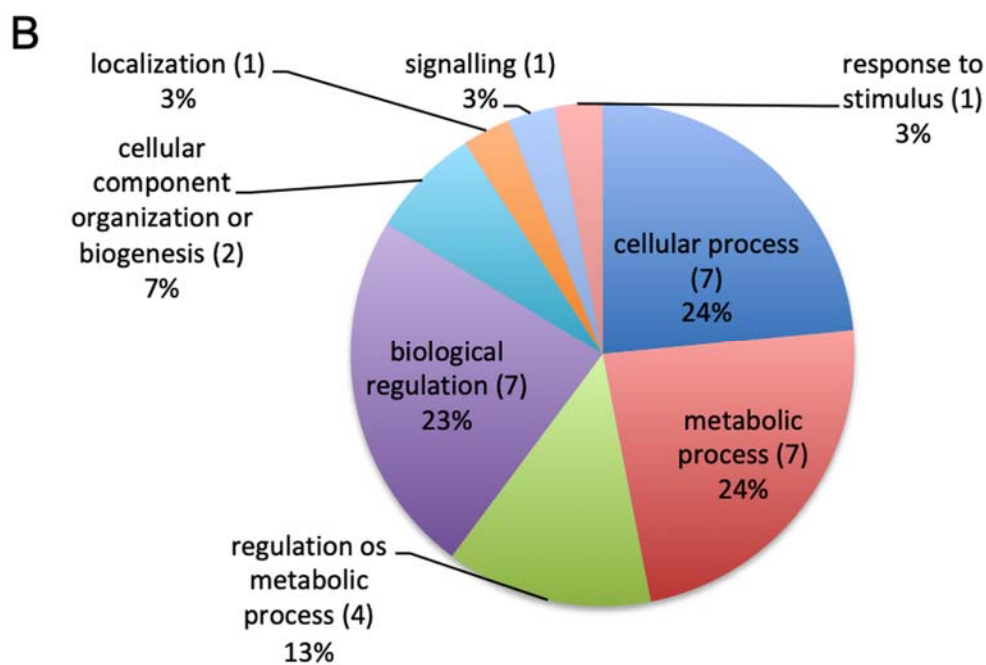

501  
502

HCBG\_02779 - U3 small nucleolar RNA-associated protein (1.55)

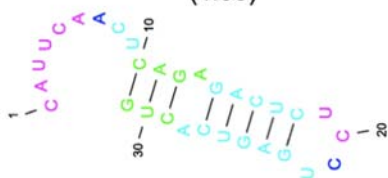

$\Delta G = -9.4\text{Kcal/mol}$

HCBG\_06937 - L-isoaspartate O-methyltransferase (1.55)

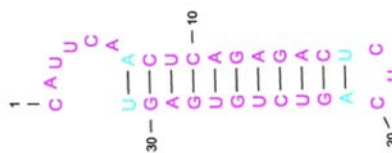

$\Delta G = -11.8\text{Kcal/mol}$

HCBG\_08604 - C-x8-C-x5-C-x3-H zinc finger protein (2.67)

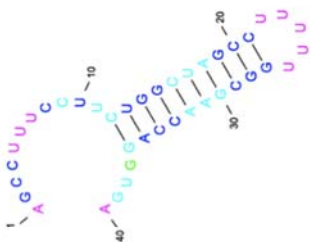

$\Delta G = -11.5\text{Kcal/mol}$

HCBG\_08483 - pre-rRNA processing protein Utp22 (9.33)

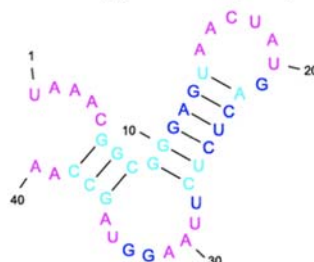

$\Delta G = -9.0\text{Kcal/mol}$

HCBG\_05622-- serine/threonine protein kinase (2.67)

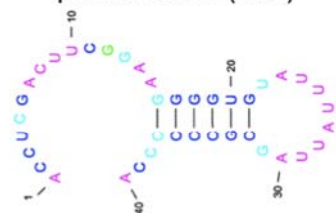

$\Delta G = -13.7\text{Kcal/mol}$

HCBG\_09127 - proteasome component C5 (0.063)

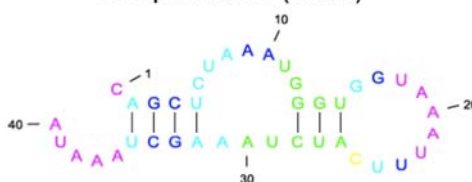

$\Delta G = -8.9\text{Kcal/mol}$

HCBG\_03558 - DNA damage responsive transcriptional repressor RPH1 (0.22)

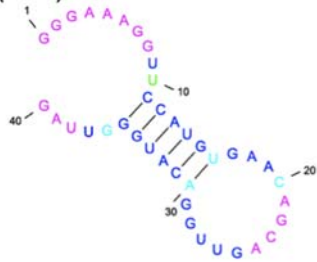

$\Delta G = -7.9\text{Kcal/mol}$

HCBG\_02620 - fungal specific transcription factor (0.22)

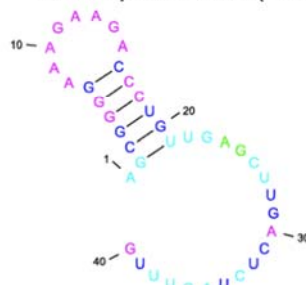

$\Delta G = -10.4\text{Kcal/mol}$

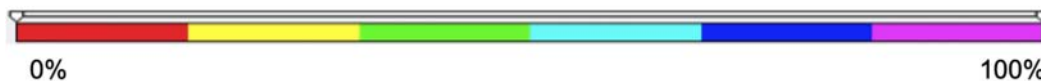

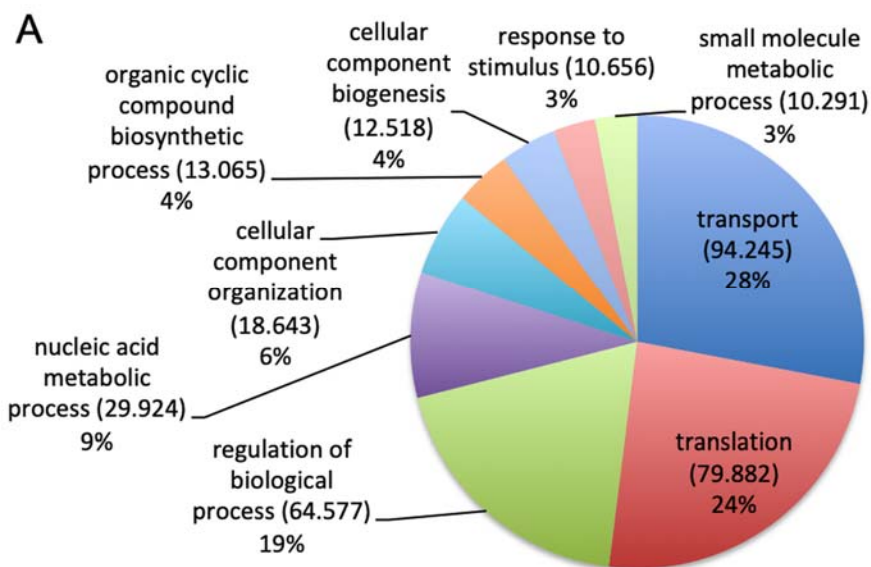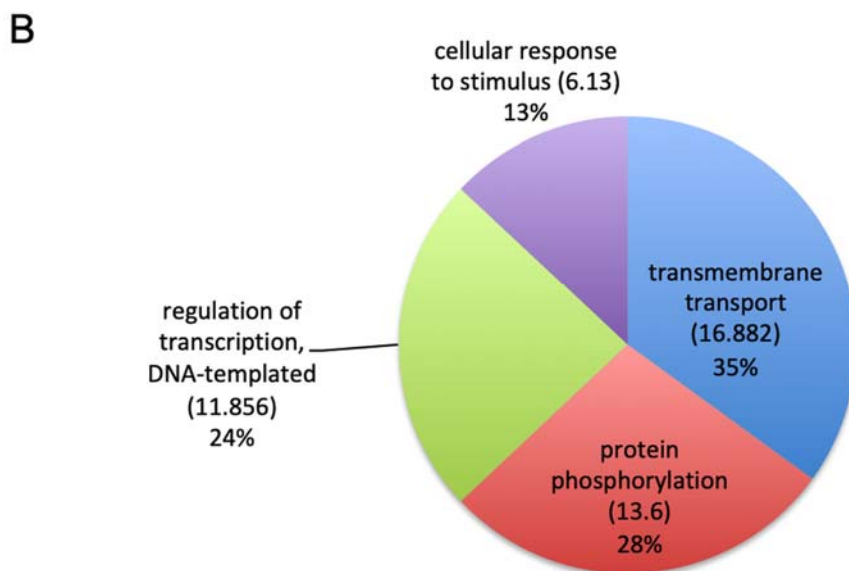

Source: https://www.biorxiv.org/content/10.1101/570291v1.full.pdf
